# Supplementary material for: Layered CrO2·nH2O as a cathode material for aqueous zinc-ion batteries: ab initio study
Source: Royal Society of Chemistry journal article supplement (doi:10.1039/d4cp02704c), 2024-01-01
Supplement: d4cp02704c1.pdf [file d4cp02704c1.pdf]

*Supporting Information*

**Layered  $\text{CrO}_2 \cdot n\text{H}_2\text{O}$  as cathode material for aqueous zinc-ion  
batteries: Ab initio study**

Lu Liu,<sup>a</sup> Zixi He,<sup>a</sup> Bingham Wu,<sup>a</sup> Hongjia Song,<sup>a\*</sup> Xiangli Zhong,<sup>a</sup> Jinbin Wang,<sup>a</sup> Daifeng Zou,<sup>b</sup>

Juanjuan Cheng<sup>b\*</sup>

<sup>a</sup>*School of Materials Science and Engineering, Key Laboratory of Low-dimensional Materials and  
Application Technology, Xiangtan University, Xiangtan 411105, P. R. China*

<sup>b</sup>*School of Materials Science and Engineering, Hunan Provincial Key Lab of Advanced Materials  
for New Energy Storage and Conversion, Department of Physics and Electronic Science, Hunan  
University of Science and Technology, Xiangtan 411201, P. R. China*

\*Corresponding author e-mail address: [hjsong@xtu.edu.cn](mailto:hjsong@xtu.edu.cn) (Hongjia Song)

[jjcheng@hnust.edu.cn](mailto:jjcheng@hnust.edu.cn) (Juanjuan Cheng)

## Supplementary Note1

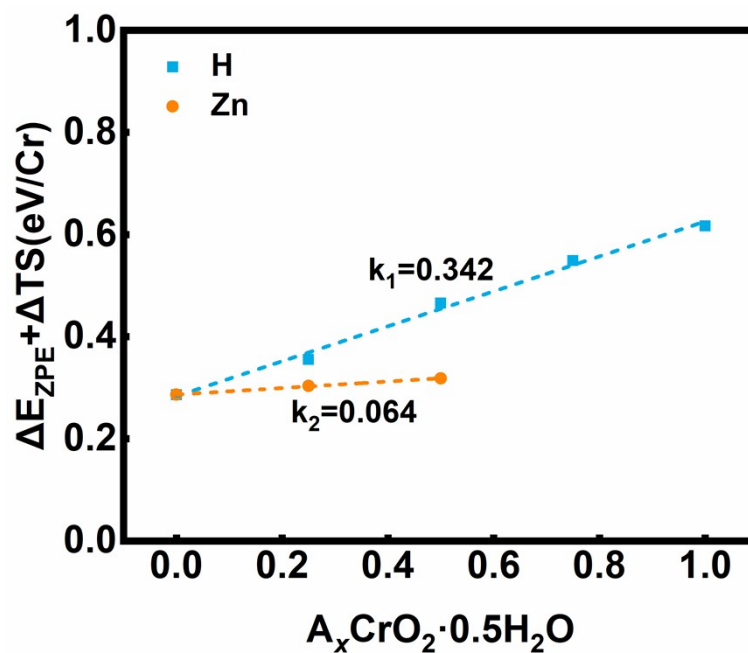

Fig. S1 The zero vibration energy ( $\Delta E_{\text{ZPE}}$ ) and entropy change ( $\Delta S$ ) of  $A_x\text{CrO}_2 \cdot 0.5\text{H}_2\text{O}$  at 298.15 K

By comparing the energy added values (zero-point vibration energy ( $\Delta E_{\text{ZPE}}$ ) and entropy change ( $\Delta S$ )) of the  $A_x\text{CrO}_2 \cdot 0.5\text{H}_2\text{O}$  ( $A=\text{H}/\text{Zn}$ ) structure at 298.15 K, it can be found that the slope corresponding to the H insertion process of the  $\text{H}_y\text{CrO}_2 \cdot 0.5\text{H}_2\text{O}$  structure is 0.342, indicating that the additional value has a significant impact on H insertion mechanism. The slope of the  $\text{Zn}_x\text{CrO}_2 \cdot 0.5\text{H}_2\text{O}$  structure during the Zn insertion process is only 0.064, indicating that the added value has a relatively small impact on the Zn insertion mechanism.

## Supplementary Note1

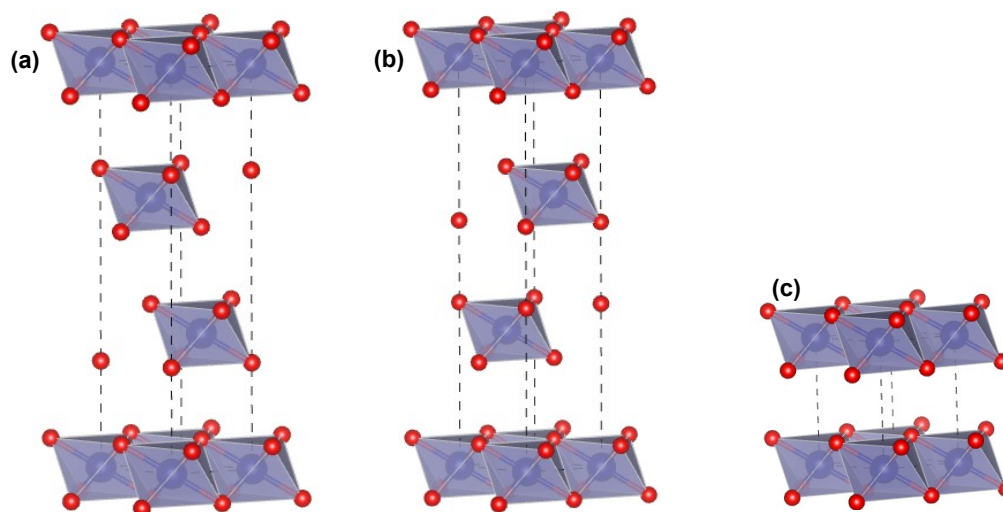

Fig. S2 Different stacking configurations of layered  $\text{CrO}_2$  structures, (a) O3 stacking; (b) P3 stacking; (c) O1 stacking.

Table S1 The lattice parameters of different stacking structures under the interlayer interaction strategy are modified by DFT-D3(U)

| Stacking type | Van der Waals | Lattice parameter ( $\text{\AA}$ ) | E(meV/f.u.)               |
|---------------|---------------|------------------------------------|---------------------------|
| O1            | DFT-D3(U)     | $a=b=2.91, c=4.58$                 | —                         |
|               | PBE           | $a=b=2.92, c=14.90$                |                           |
|               | DFT-D3        | $a=b=2.89, c=13.49$                |                           |
| O3            | DFT-D3(U)     | $a=b=2.91, c=13.67$                | $a=b=2.8797, c=14.169[1]$ |
|               | vdW-DF2(U)    | $a=b=2.98, c=13.77$                |                           |
|               | opt86b-vdw(U) | $a=b=2.91, c=13.48$                |                           |
| P3            | DFT-D3(U)     | $a=b=2.91, c=14.64$                | $a=b=2.8578, c=14.002[2]$ |

The common stacking configurations of layered structures include O1, P3, and O3 stacking. The difference between the three structures is the lateral stacking displacement of the O-Cr-O layer, where oxygen atoms exhibit ABAB, ABBCA, and ABCABC stacking along the c-axis direction, respectively. By using different van der Waals correction methods to correct the interlayer spacing of O3- $\text{CrO}_2$  structure, it was found that the theoretical value was always smaller than the c-axis of the experimentally reported O3- $\text{CrO}_2$  structure, which may be related to the presence of a small amount of  $\text{Na}^+$  between the  $\text{CrO}_2$  layers ( $\text{Na}_\delta\text{CrO}_2$ )[1]. Therefore, the subsequent calculations were only optimized using the DFT-D3 (U) method.

## Occupation site

For the Zn insertion mechanism, the non-equivalent sites occupied by Zn are the octahedral center ( $Zn_1$ ) and tetrahedral center ( $Zn_2$ ), with corresponding adsorption energies ( $E_{ad}$ ) of -4.48 eV and -3.98 eV. Meanwhile, for the H insertion mechanism, the non-equivalent sites occupied by H in the O3-CrO<sub>2</sub> structure are lattice oxygen forming -OH bonds and pointing towards the octahedral center ( $H_1$ ), octahedral center ( $H_2$ ), and parallel tetrahedral center ( $H_3$ ), respectively. The corresponding adsorption energies ( $E_{ad}$ ) are -2.68 eV, 0.38 eV, and -2.39 eV. The non-equivalent sites occupied by H in the P3-CrO<sub>2</sub> structure are the interlayer hydrogen bonding ( $H_1$ ), tetrahedral center ( $H_2$ ), and hexagonal prism center ( $H_3$ ) formed by H and lattice oxygen. The structural optimization of H located at the center of the hexagonal prism has not converged, and the corresponding adsorption energies ( $E_{ad}$ ) for the latter two are -2.79 eV and 0.45 eV.

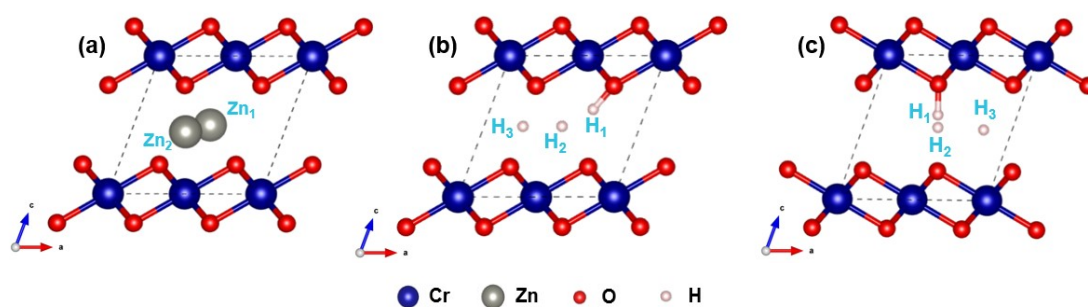

Fig. S3 For different reaction mechanisms, the non-equivalent sites occupied by the guest species in the CrO<sub>2</sub> structure, (a) Zn insertion; (b) H insertion (O3 stacking); (c) H insertion (P3 stacking)

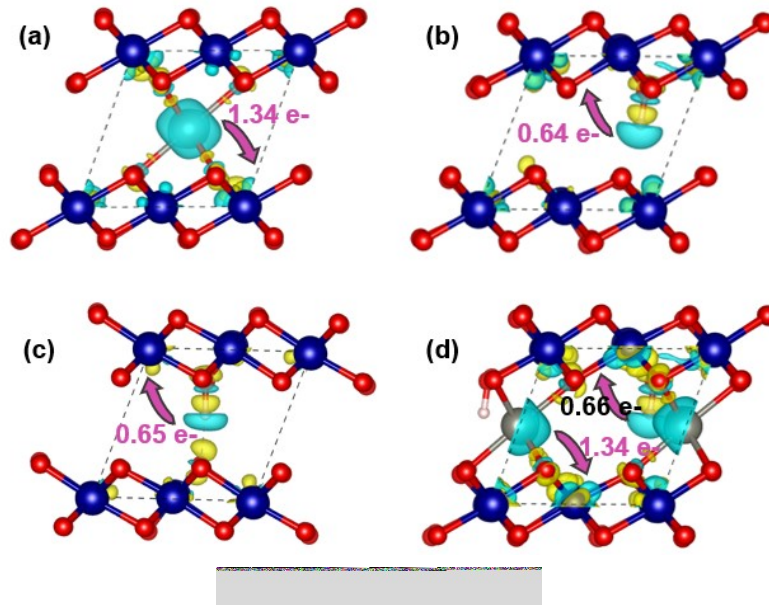

Fig. S4 The charge density differences between the guest ion and the substrate under different reaction mechanisms, (a)  $\text{Zn}_{0.125}\text{CrO}_2$  (Zn insertion); (b)  $\text{O}_3\text{-H}_{0.125}\text{CrO}_2$  (H insertion); (c)  $\text{P}_3\text{-H}_{0.125}\text{CrO}_2$  (H insertion); (d)  $\text{H}_{0.125}\text{Zn}_{0.125}\text{CrO}_2$  (H/Zn co-insertion). The green and yellow indicate electron depletion and aggregation, respectively, The isosurface is  $0.01 \text{ electron}/\text{\AA}^3$ .

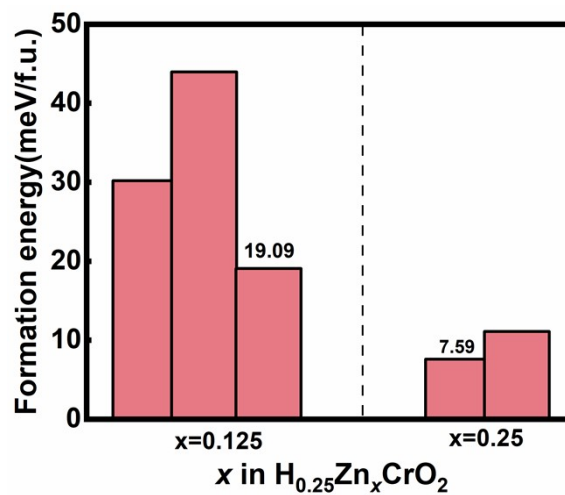

Fig. S5 The formation energy of different  $\text{H}_{0.25}\text{Zn}_x\text{CrO}_2$  configurations

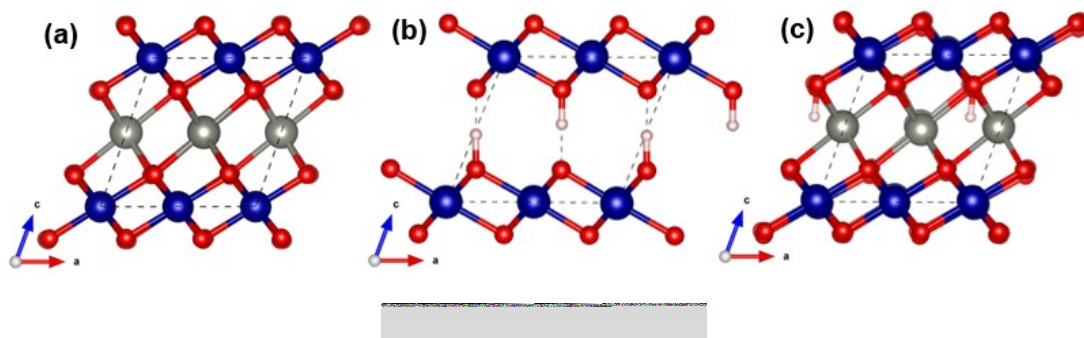

Fig. S6 The theoretical capacity of CrO<sub>2</sub> electrode is based on different reaction mechanisms, (a) Zn<sub>0.5</sub>CrO<sub>2</sub> (Zn insertion); (b) P3-HCrO<sub>2</sub> (H insertion); (c) H<sub>0.125</sub>Zn<sub>0.375</sub>CrO<sub>2</sub> (H/Zn co-insertion).

### H insertion mechanism

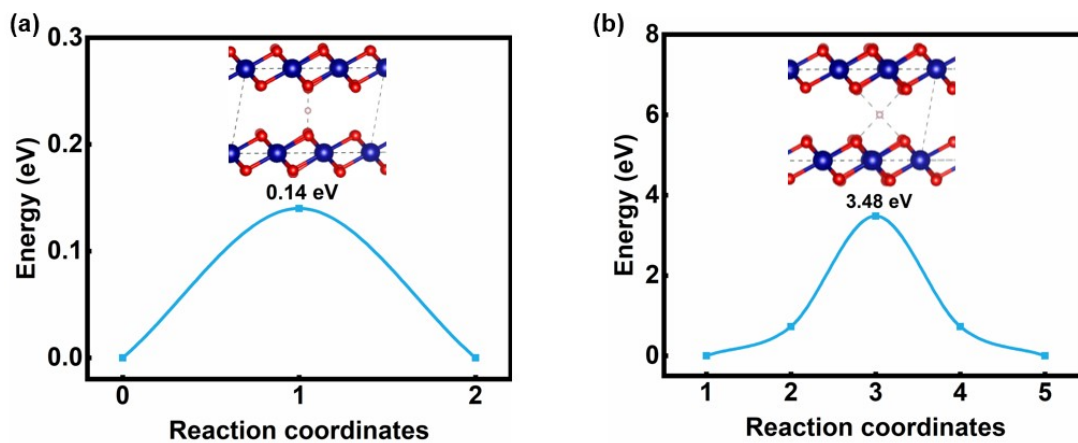

Fig. S7 The diffusion barrier and corresponding transition state model of H in P3-CrO<sub>2</sub> structure (a) Path 1 (Longitudinal jump); (b) Path 2 (Transverse diffusion)

## H/Zn co-insertion mechanism

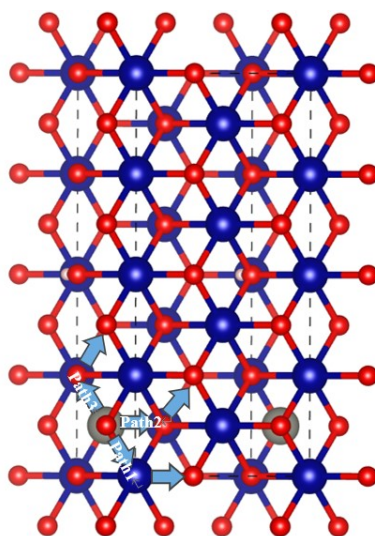

Fig. S8 The three diffusion paths of Zn at the  $\text{CrO}_2$  electrode are under the H/Zn co-insertion mechanism

$\text{CrO}_2 \cdot n\text{H}_2\text{O}$  ( $n=0.25\sim 1.0$ )

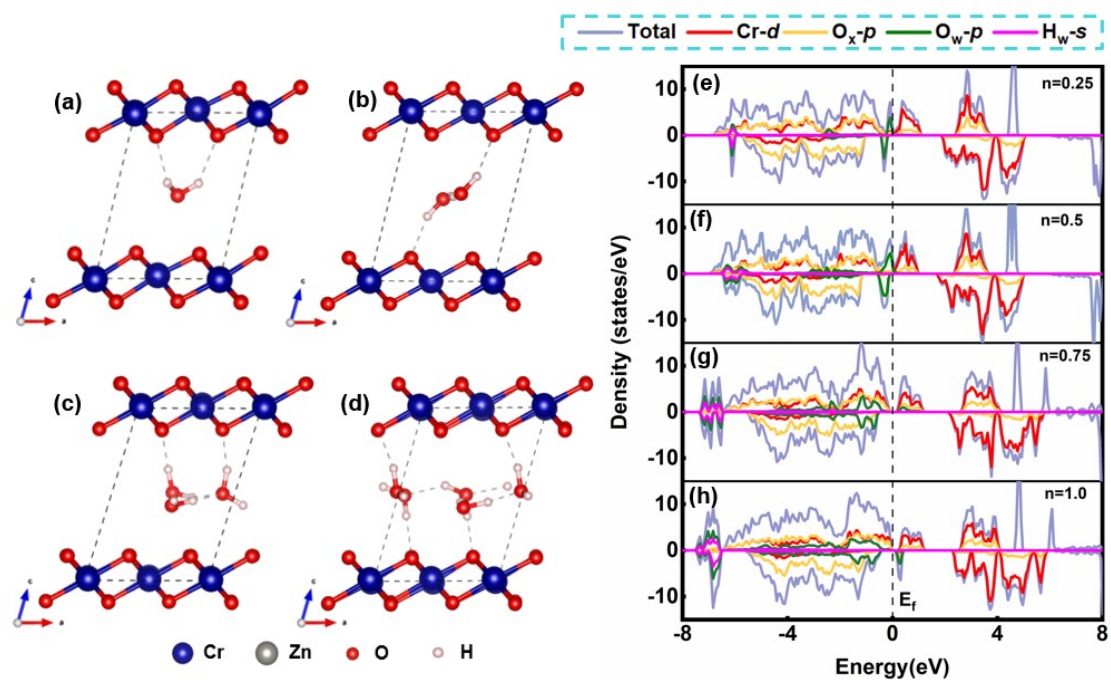

Fig. S9 The optimized pre-intercalation structure water model ( $\text{CrO}_2 \cdot n\text{H}_2\text{O}$ , (a-d)) and corresponding Density of states (e-h).

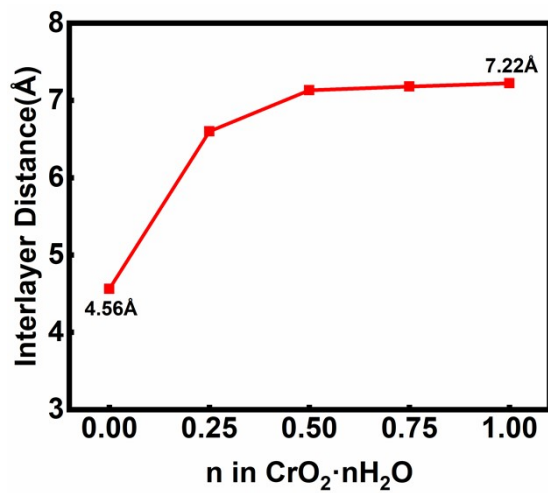

Fig. S10 The interlayer distance of  $\text{CrO}_2$  electrodes after pre-intercalation into structural water ( $n=0.25\sim 1.0$ )



## Zn insertion mechanism

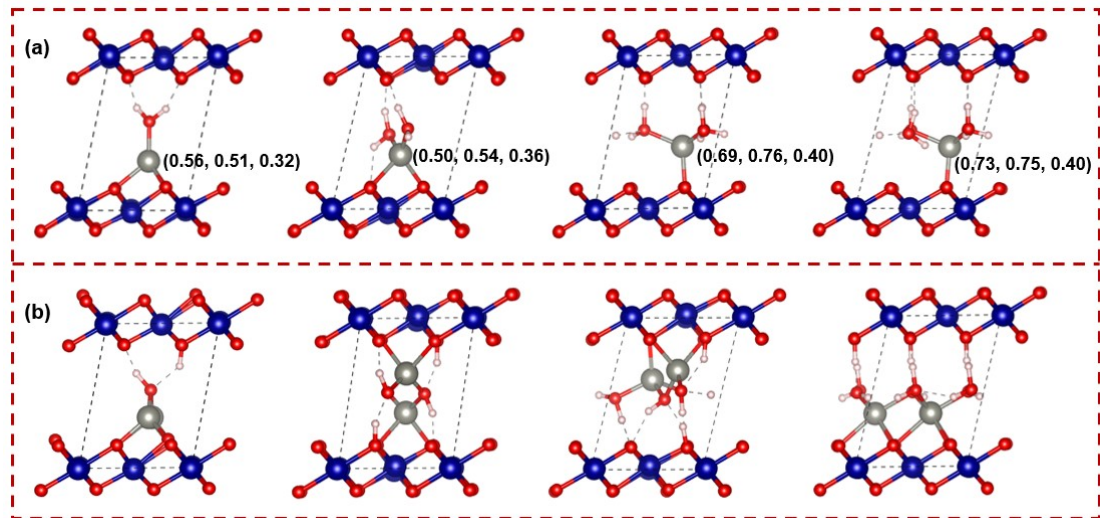

Fig. S11 The structural configurations for Zn intercalation in  $(1 \times 2 \times 1)$  supercell of  $\text{CrO}_2 \cdot n\text{H}_2\text{O}$  ( $n=0.25, 0.5, 0.75, 1.0$ ) with different Zn concentrations (a)  $c(\text{Zn})=0.25$ ; (b)  $c(\text{Zn})=0.5$ .

## H insertion mechanism

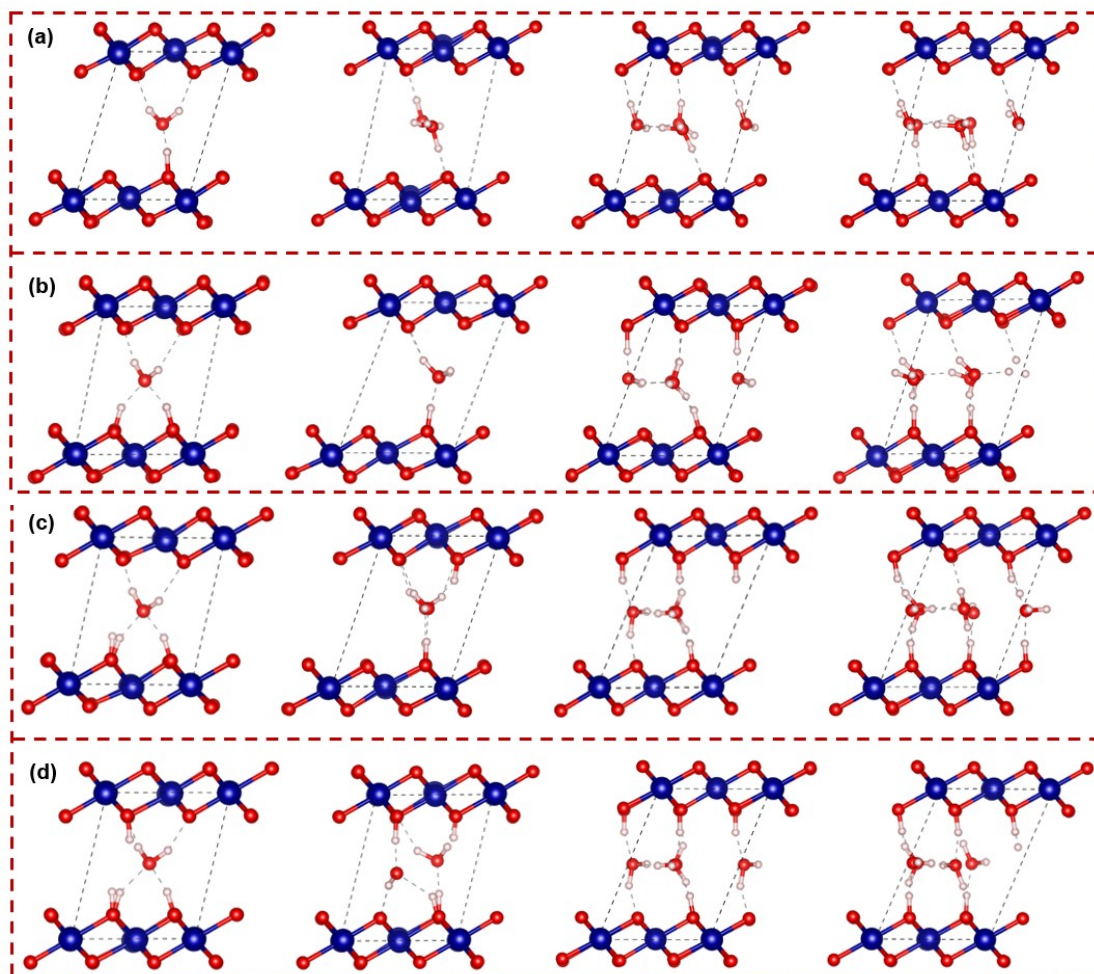

Fig. S12 The structural configurations for H inserted in  $(1 \times 2 \times 1)$  supercell of  $\text{CrO}_2 \cdot n\text{H}_2\text{O}$  ( $n=0.25, 0.5, 0.75, 1.0$ ) with different H concentrations (a)  $c(\text{H})=0.25$ ; (b)  $c(\text{H})=0.5$ ; (c)  $c(\text{H})=0.75$ ; (d)  $c(\text{H})=1.0$ .

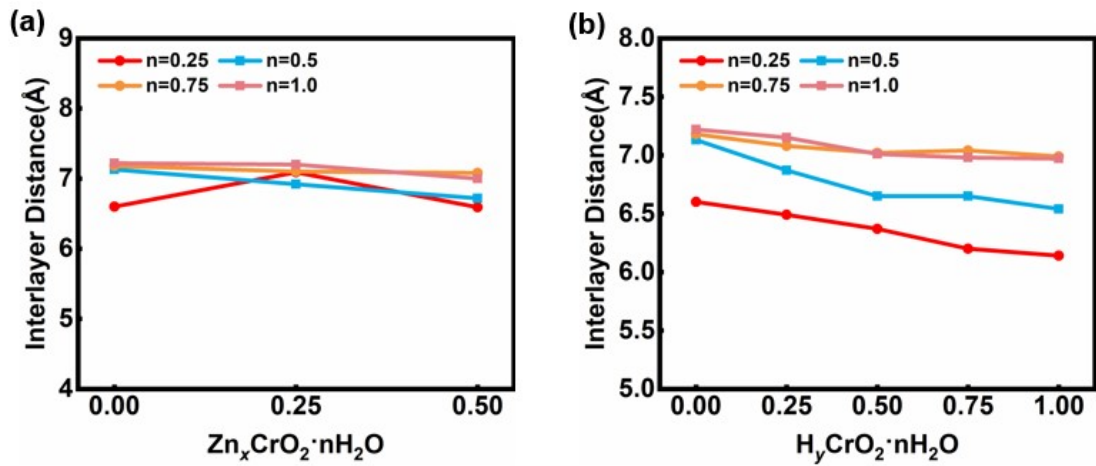

Fig. S13 The interlayer distance of  $CrO_2 \cdot nH_2O$  at different insertion stages (a) Zn insertion mechanism; (b) H insertion mechanism.

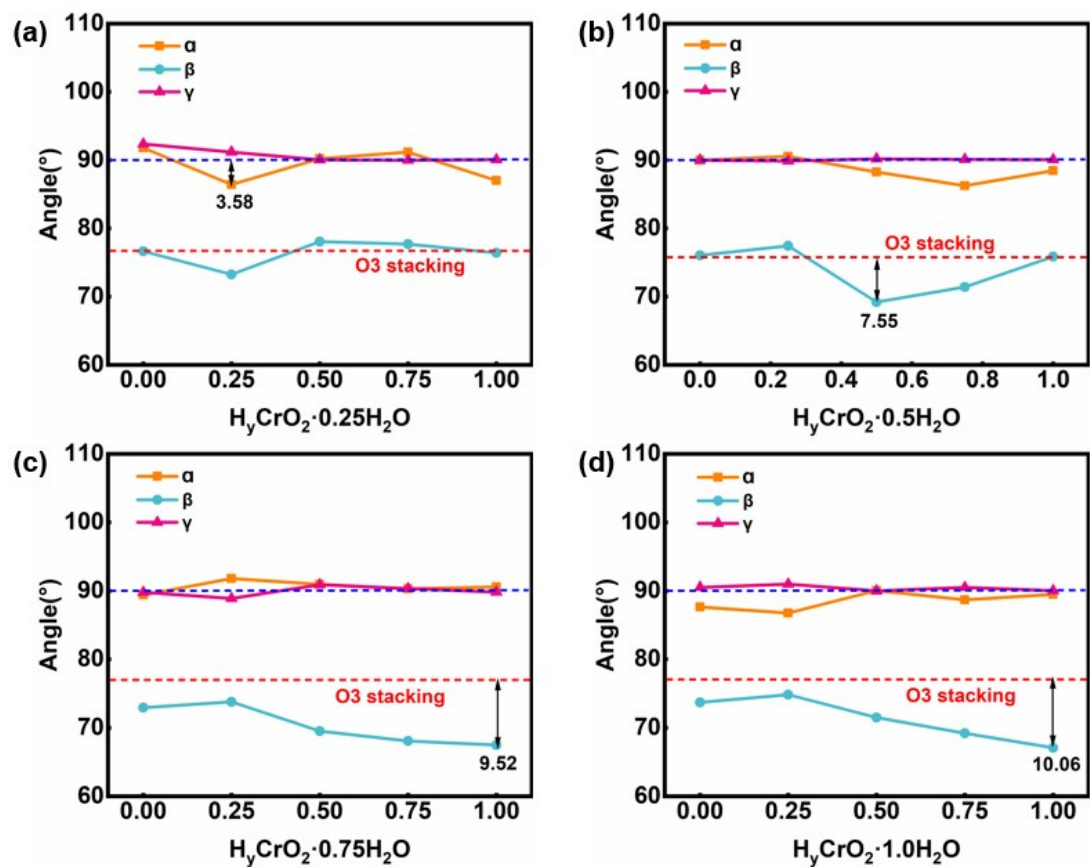

Fig. S14 The angle between the base vectors at different stages of H insertion in  $H_yCrO_2 \cdot nH_2O$ , (a)  $n=0.25$ ; (b)  $n=0.5$ ; (c)  $n=0.75$ ; (d)  $n=1.0$ .

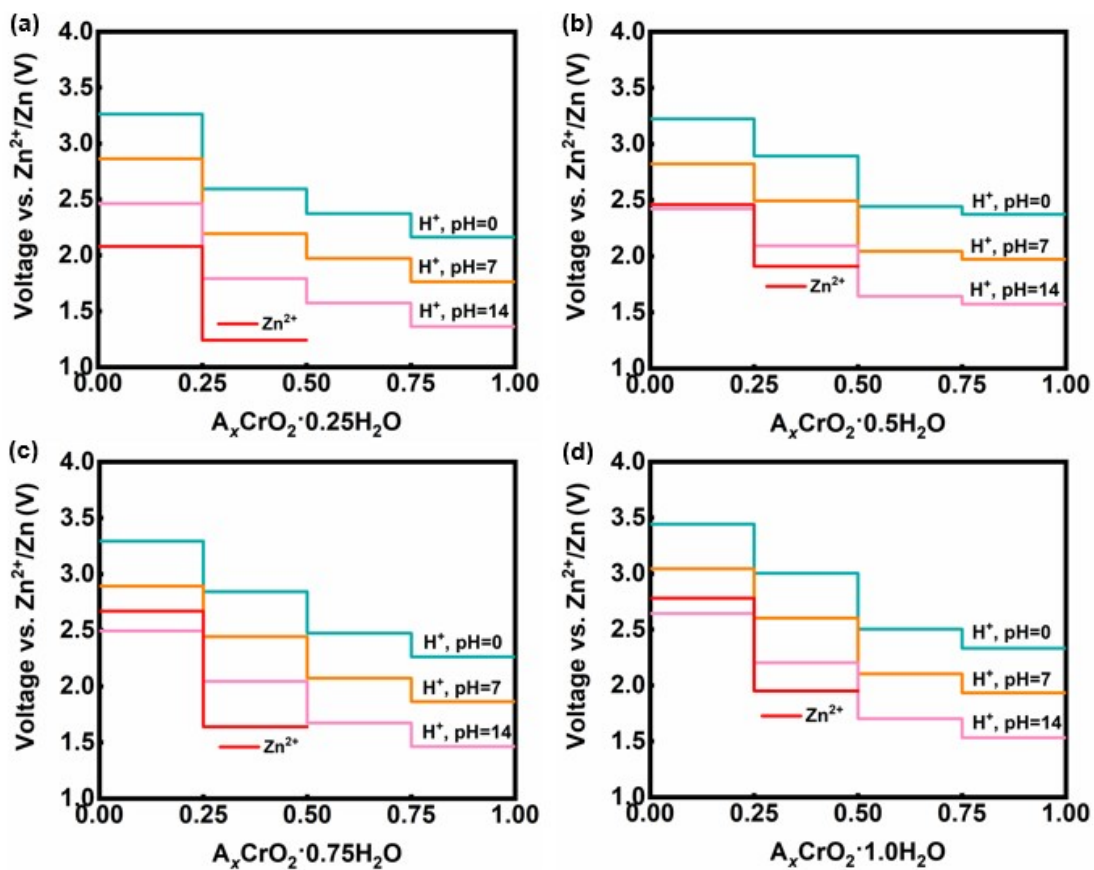

Fig. S15 Discharge curves of  $\text{Zn}^{2+}$  (red) and  $\text{H}^+$  (based on different pH values) insertion/extraction process in  $\text{CrO}_2 \cdot n\text{H}_2\text{O}$  ( $n=0.0\sim 1.0$ ).

### H/Zn co-insertion mechanism

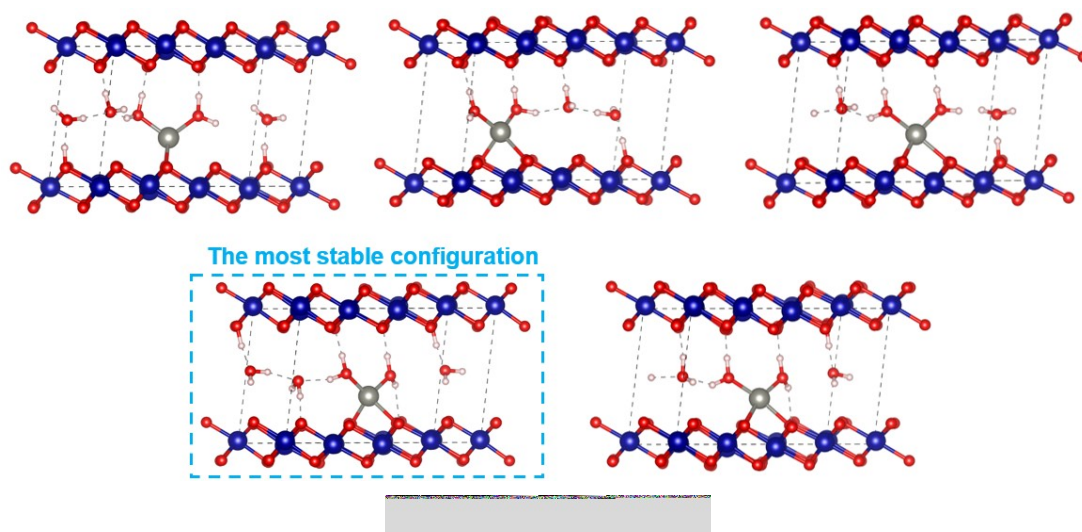

Fig. S16 The various optimized configurations of  $\text{H}_{0.125}\text{Zn}_{0.125}\text{CrO}_2 \cdot 0.5\text{H}_2\text{O}$  (H/Zn co-insertion mechanism)

Table S2 Lattice parameters and volumes of  $\text{CrO}_2 \cdot n\text{H}_2\text{O}$  and  $\text{Zn}_x\text{CrO}_2 \cdot n\text{H}_2\text{O}$  configurations

| c(H <sub>2</sub> O) | lattice parameter |       |       |          |         |          | volume         |
|---------------------|-------------------|-------|-------|----------|---------|----------|----------------|
|                     | a                 | b     | c     | $\alpha$ | $\beta$ | $\gamma$ |                |
|                     | Å                 |       |       | o        |         |          | Å <sup>3</sup> |
| 0                   | 5.048             | 5.828 | 4.853 | 90       | 69.72   | 90       | 133.929        |
| 0.25                | 5.004             | 5.924 | 6.836 | 91.79    | 76.64   | 92.36    | 196.962        |
| x=0.25              | 5.143             | 5.92  | 7.372 | 93.65    | 78.01   | 89.83    | 219.075        |
| x=0.5               | 5.214             | 6.012 | 6.828 | 84.43    | 78.66   | 89.77    | 208.820        |
| 0.5                 | 5.184             | 5.677 | 7.45  | 90       | 76.055  | 90       | 212.807        |
| x=0.25              | 5.133             | 5.909 | 7.192 | 84.94    | 76.55   | 90.96    | 211.188        |
| x=0.5               | 5.183             | 6.058 | 6.853 | 90       | 82.44   | 90       | 213.344        |
| 0.75                | 5.145             | 5.832 | 7.52  | 89.39    | 72.93   | 89.78    | 215.576        |
| x=0.25              | 5.107             | 5.954 | 7.336 | 88.70    | 77.07   | 89.42    | 217.417        |
| x=0.5               | 5.241             | 6.051 | 7.317 | 86.63    | 76.24   | 91.55    | 224.818        |
| 1.0                 | 5.207             | 5.821 | 7.560 | 87.63    | 73.69   | 90.50    | 219.693        |
| x=0.25              | 5.137             | 5.955 | 7.308 | 87.95    | 78.23   | 91.53    | 221.476        |
| x=0.5               | 5.235             | 6.061 | 7.235 | 90.03    | 76.47   | 89.99    | 223.186        |

Table S3 Lattice parameters and volumes of  $\text{CrO}_2 \cdot n\text{H}_2\text{O}$  and  $\text{H}_y\text{CrO}_2 \cdot n\text{H}_2\text{O}$  configurations

| c(H <sub>2</sub> O) | lattice parameter |       |       |          |         |          | volume         |
|---------------------|-------------------|-------|-------|----------|---------|----------|----------------|
|                     | a                 | b     | c     | $\alpha$ | $\beta$ | $\gamma$ |                |
|                     | Å                 |       |       | o        |         |          | Å <sup>3</sup> |
| 0                   | 5.048             | 5.828 | 4.853 | 90       | 69.72   | 90       | 133.929        |
| 0.25                | 5.004             | 5.924 | 6.836 | 91.79    | 76.64   | 92.36    | 196.962        |
| y=0.25              | 5.042             | 5.963 | 6.878 | 86.42    | 73.25   | 91.18    | 197.449        |
| y=0.5               | 5.105             | 6.008 | 6.536 | 90.21    | 78.07   | 90.04    | 196.144        |
| y=0.75              | 5.187             | 6.053 | 6.414 | 91.17    | 77.69   | 89.98    | 196.736        |
| y=1.0               | 5.267             | 6.093 | 6.411 | 87.02    | 76.43   | 90.06    | 199.719        |
| 0.5                 | 5.184             | 5.677 | 7.45  | 90       | 76.055  | 90       | 212.807        |
| y=0.25              | 5.155             | 5.795 | 7.159 | 90.56    | 77.44   | 89.87    | 208.743        |
| y=0.5               | 5.146             | 5.962 | 7.224 | 88.26    | 69.19   | 90.19    | 207.033        |
| y=0.75              | 5.244             | 5.998 | 7.143 | 86.25    | 71.40   | 90.11    | 212.420        |
| y=1.0               | 5.261             | 6.079 | 6.788 | 88.46    | 75.84   | 90.08    | 210.399        |
| 0.75                | 5.145             | 5.832 | 7.52  | 89.39    | 72.93   | 89.78    | 215.576        |
| y=0.25              | 5.124             | 5.85  | 7.472 | 91.79    | 73.79   | 88.88    | 214.901        |
| y=0.5               | 5.124             | 5.998 | 7.427 | 90.95    | 69.52   | 90.88    | 213.819        |
| y=0.75              | 5.201             | 6.04  | 7.578 | 90.29    | 68.06   | 90.32    | 220.825        |
| y=1.0               | 5.253             | 6.101 | 7.558 | 90.58    | 67.47   | 89.82    | 223.739        |
| 1.0                 | 5.207             | 5.821 | 7.560 | 87.63    | 73.69   | 90.50    | 219.693        |
| y=0.25              | 5.179             | 5.829 | 7.476 | 86.75    | 74.84   | 90.97    | 217.392        |
| y=0.5               | 5.209             | 5.941 | 7.445 | 90.03    | 71.49   | 90.00    | 218.542        |
| y=0.75              | 5.239             | 6.024 | 7.498 | 88.68    | 69.20   | 90.49    | 221.109        |
| y=1.0               | 5.269             | 6.108 | 7.604 | 89.48    | 67.09   | 90.02    | 225.444        |

## References

- [1] S.-H. Bo, X. Li, A.J. Toumar, and G. Ceder, *Chemistry of Materials*, 2016, 28, 1419-1429.
- [2] X. Xia, and J.R. Dahn, *Electrochemical and Solid-State Letters*, 2012, 15.
